# Supplementary material for: Right inferior frontal gyrus implements motor inhibitory control via beta-band oscillations in humans
Source: eLife. 2021 Mar 23;10:e61679. doi: 10.7554/eLife.61679 (PMC8096430; doi:10.7554/eLife.61679)
Supplement: Figure 1—source data 1. [file elife-61679-fig1-data1.csv]

Subject	Stop color	mean cGO	mean cAC	mean fSTOP	mean SSD	Stop inhibition rate	Stop failure rate	go_response_rate	go_response_rate_AC	missedGO	missedAC	incGO	incAC	accGO	accAC	SSRT_integr	mean ACSD	mean SSD sSTOP	mean SSD fSTOP	mean ACSD cAC
AHK88	stopGreen	460.508	467.666	395.033	160.217	0.45652	0.54348	0.99104	0.99283	0.0089606	0.0035842	0.0071685	0.010753	0.98387	0.98566	287.783	163.658	155.405	164.26	164.407
ASF86	stopBlue	507.978	512.664	448.652	227.707	0.5	0.5	0.99286	0.99041	0.0071429	0.014599	0.0071429	0.018248	0.98571	0.96715	250.293	229.178	219.152	236.261	231.989
ASR86	stopBlue	548.715	535.374	469.275	230.986	0.50538	0.49462	0.98561	0.99041	0.014388	0	0.0017986	0	0.98381	1	305.014	242.079	216.376	245.913	242.079
ASR87	stopBlue	628.811	696.076	592.559	411.14	0.53137	0.46863	0.98768	0.98687	0.012324	0.014815	0	0.014815	0.98768	0.97037	211.86	418.308	403.799	419.465	424.695
ASZ83	stopGreen	711.184	755.984	656.436	493.726	0.54074	0.45926	0.95645	0.95838	0.043554	0.037453	0.010453	0.029963	0.94599	0.93258	216.274	501.093	502.075	483.895	517.193
EAI86	stopBlue	413.205	409.092	373.385	142.504	0.51087	0.48913	0.9964	0.99519	0.0036036	0.0072202	0.012613	0.0072202	0.98378	0.98556	259.496	146.884	128.191	157.452	147.099
ENL85	stopGreen	657.766	691.383	599.674	413.587	0.51087	0.48913	0.99274	0.99397	0.0072595	0.0035971	0.0018149	0	0.99093	0.9964	230.413	426.072	407.128	420.333	426.072
ESR87	stopBlue	513.324	571.312	454.857	285.552	0.50741	0.49259	0.99296	0.99165	0.0070423	0.011111	0.0035211	0.040741	0.98944	0.94815	207.448	287.345	292.671	278.218	297.863
IAR90	stopBlue	486.719	490.96	422.993	173.849	0.49281	0.50719	0.97138	0.97971	0.028623	0.0035842	0.0053667	0	0.96601	0.99642	297.151	171.291	158.328	188.929	171.291
IEN88	stopGreen	575.364	621.907	558.187	280.032	0.5	0.5	0.99282	0.99403	0.0071813	0.0035714	0	0	0.99282	0.99643	300.968	283.341	264.691	295.374	283.341
IET89	stopBlue	479.701	502.462	437.632	217.826	0.51282	0.48718	0.99745	0.9983	0.002551	0	0	0.005102	0.99745	0.9949	244.174	220.862	203.72	232.674	221.138
IKL86	stopGreen	534.851	569.39	471.588	308.583	0.55729	0.44271	0.99488	0.99485	0.0051151	0.0052083	0	0.020833	0.99488	0.97396	169.417	303.817	308.196	309.071	309.604
INL89	stopBlue	420.297	483.917	417.362	204.931	0.50181	0.49819	0.99286	0.99523	0.0071429	0	0	0.0035971	0.99286	0.9964	208.069	205.363	190.791	219.174	206.105
INS88	stopBlue	697.662	719.619	632.321	446.963	0.52015	0.47985	0.98569	0.988	0.014311	0.0072993	0	0.014599	0.98569	0.9781	248.037	438.985	433.056	462.038	445.537
INT85	stopGreen	474.702	496.876	419.944	182.636	0.49393	0.50607	0.98431	0.98836	0.015686	0.0038023	0.011765	0.011407	0.97255	0.98479	275.364	194.882	175.615	189.488	195.205
JAD89	stopGreen	504.296	541.416	467.942	253.616	0.5	0.5	0.99462	0.99642	0.0053763	0	0.0017921	0.0035714	0.99283	0.99643	245.384	253.85	242.79	264.442	254.76
NAK81	stopBlue	715.361	758.534	653.626	476.528	0.57249	0.42751	0.90925	0.91827	0.090747	0.062963	0.0017794	0.055556	0.90747	0.88148	253.472	467.719	491.208	456.87	496.281
NAK89	stopGreen	501.894	542.366	461.539	217.358	0.49462	0.50538	0.99821	0.99881	0.0017921	0	0.0017921	0.0035714	0.99642	0.99643	276.642	221.107	201.413	232.964	221
NAZ65	stopGreen	747.995	796.232	717.712	518.776	0.55133	0.44867	0.97018	0.97013	0.029825	0.029963	0.0035088	0.033708	0.96667	0.93633	235.224	505.529	514.055	524.576	523.728
NEN86	stopBlue	387.689	437.839	377.088	118.701	0.45817	0.54183	0.99402	0.99336	0.0059761	0.0079681	0.001992	0.0039841	0.99203	0.98805	270.299	115.538	104.348	130.838	115.802
NER85	stopBlue	620.42	635.889	550.926	331.511	0.51087	0.48913	0.97674	0.98451	0.023256	0	0.0017889	0.0071429	0.97496	0.99286	286.489	330.718	318.879	344.704	332.737
NEZ89	stopGreen	477.98	518.62	473.368	140.931	0.40942	0.59058	0.98746	0.98445	0.012545	0.021583	0.016129	0.032374	0.97133	0.94604	339.069	143.033	147.496	136.38	145.51
RDR86	stopBlue	525.809	559.375	458.156	288.809	0.51264	0.48736	0.99466	0.99641	0.0053381	0	0	0.0072993	0.99466	0.9927	240.191	293.861	277.486	300.719	295.099
SAN90	stopGreen	474.887	525.188	418.624	177.41	0.4886	0.5114	0.99512	0.99566	0.004878	0.0032573	0.004878	0.009772	0.99024	0.98697	290.59	181.474	163.94	190.28	182.277
TTR69	stopBlue	677.613	734	627.707	460.605	0.53759	0.46241	0.9386	0.94358	0.061404	0.045627	0	0.04943	0.9386	0.90494	227.395	449.382	462.909	457.927	473.929
USL82	stopGreen	423.351	496.705	393.575	204.071	0.50357	0.49643	1	1	0	0	0	0.0035842	1	0.99642	201.929	208.778	189.369	218.986	208.745
VAP89	stopGreen	415.798	425.783	382.535	133.351	0.49104	0.50896	0.99099	0.99281	0.009009	0.0035714	0.018018	0.0071429	0.97297	0.98929	269.649	135.05	117.861	148.296	135
INUW21	stopGreen	421.317	439.232	385.186	179.491	0.49458	0.50542	1	1	0	0	0.0017889	0	0.99821	1	234.509	187.804	164.869	193.8	187.804
KEHE13	stopBlue	665.696	708.363	590.417	419.193	0.54545	0.45455	0.91328	0.93142	0.086716	0.030769	0.00369	0.057692	0.90959	0.91154	244.807	402.718	422.986	414.642	428.207
TAJO27	stopBlue	564.151	613.557	505.682	336.199	0.51087	0.48913	0.98934	0.99165	0.010657	0.0036364	0.0035524	0.010909	0.98579	0.98545	224.801	342.405	328.071	344.689	344.963
NAAL13	stopGreen	748.713	800.657	702.262	508.879	0.53788	0.46212	0.90614	0.92224	0.093863	0.04461	0	0.066914	0.90614	0.88848	259.121	479.981	509.634	508	514.799
TAMA13	stopGreen	562.759	607.504	505.488	335.857	0.53309	0.46691	0.98594	0.98807	0.01406	0.0074349	0	0.026022	0.98594	0.96654	195.143	349.768	337.524	333.953	359.185
NAMA13	stopGreen	652	701.937	579.172	422.933	0.54815	0.45185	0.95745	0.96296	0.042553	0.025641	0.001773	0.047619	0.95567	0.92674	215.067	422.376	421.331	424.877	440.707
NERA09	stopBlue	413.875	476.399	397.674	167.094	0.49281	0.50719	0.9982	0.99761	0.0017953	0.0035714	0.0071813	0.010714	0.99102	0.98571	236.906	171.409	153.715	180.092	171.696
NAHA12	stopBlue	399.384	460.245	374.643	148.04	0.49458	0.50542	0.99643	0.99524	0.0035714	0.0071429	0.0053571	0.0035714	0.99107	0.98929	231.96	155.209	134.022	161.757	155.347
DAGE13	stopBlue	737.867	782.566	687.231	506.109	0.52734	0.47266	0.85185	0.88763	0.14815	0.035714	0	0.031746	0.85185	0.93254	255.891	502.881	500.607	512.248	520
TEHE15	stopGreen	552.858	628.374	490.943	344.364	0.54412	0.45588	0.99297	0.99167	0.0070299	0.01107	0.0035149	0.01107	0.98946	0.97786	198.636	354.772	338.973	350.798	358.789
IAWJ35	stopBlue	643.165	718.579	577.237	421.768	0.5444	0.4556	0.98224	0.98177	0.017762	0.019231	0	0.030769	0.98224	0.95	216.232	437.337	438.071	402.288	451.502
CMYK57	stopBlue	482.063	549.059	430.406	272.445	0.51103	0.48897	0.99644	0.99641	0.0035587	0.0036496	0.0035587	0.010949	0.99288	0.9854	186.555	275.282	264.367	280.887	278.341
ELSA15	stopBlue	637.078	686.253	572.302	383.004	0.51866	0.48134	0.92421	0.94514	0.075786	0.011494	0.0018484	0.019157	0.92237	0.96935	234.996	377.07	378.137	388.248	384.522
BIHA10	stopGreen	570.029	620.712	514.623	354.766	0.52381	0.47619	0.98582	0.98929	0.014184	0.0036232	0.0053191	0.014493	0.9805	0.98188	202.234	351.844	345.755	364.677	356.668
REHE21	stopGreen	590.921	629.377	515.467	309.259	0.51417	0.48583	0.99002	0.98936	0.00998	0.011952	0.003992	0.015936	0.98603	0.97211	263.741	313.988	307.079	311.567	318.246
NHVA26	stopGreen	755.839	783.977	711.195	542.559	0.52941	0.47059	0.98384	0.98072	0.016158	0.025641	0	0.010989	0.98384	0.96337	210.441	548.65	533.243	553.039	554.909
KX64V	stopBlue	535.738	554.679	464.681	255.702	0.49265	0.50735	0.9698	0.97593	0.030195	0.011194	0.0071048	0.022388	0.9627	0.96642	262.298	259.276	260.836	250.717	262.378
VJ22T	stopBlue	577.228	588.429	517.694	307.964	0.51273	0.48727	0.99459	0.99639	0.0054054	0	0	0.01087	0.99459	0.98913	251.036	301.094	299.142	317.246	304.403
LE71W	stopBlue	614.581	655.271	553.557	366.254	0.53788	0.46212	0.96583	0.97209	0.034173	0.014925	0	0.022388	0.96583	0.96269	226.746	377.731	368.782	363.312	386.515
FE61P	stopGreen	617.368	643.183	560.367	381.5	0.52941	0.47059	0.96643	0.97387	0.033569	0.01087	0.0017668	0.036232	0.96466	0.9529	236.5	369.604	370.611	393.75	383.658
XY29N	stopGreen	432.388	469.82	428.027	122.416	0.47312	0.52688	0.99821	0.99761	0.0017889	0.0035842	0.0071556	0.0035842	0.99106	0.99283	300.584	128.874	109.621	133.905	128.917
LM60H	stopGreen	475.586	530.457	431.815	241.74	0.51264	0.48736	0.98039	0.98088	0.019608	0.018116	0	0.0072464	0.98039	0.97464	213.26	240.144	229.866	254.23	241.929
PW70F	stopGreen	599.965	655.996	541.181	349.55	0.52066	0.47934	0.9604	0.96538	0.039604	0.02439	0.0059406	0.0081301	0.95446	0.96748	218.45	351.171	356.587	341.905	354.122
DC20A	stopGreen	605.803	631.935	539.41	384.397	0.52632	0.47368	0.97233	0.98143	0.027668	0	0	0.0040323	0.97233	0.99597	200.603	390.198	376.531	393.137	391.777
UH45C	stopBlue	538.949	538.078	468.425	239.928	0.49638	0.50362	0.96029	0.97226	0.039711	0.0036364	0.01083	0.014545	0.94946	0.98182	283.072	237.661	231.81	247.928	241.181
TL24V	stopBlue	659.375	671.989	590.967	402.511	0.54167	0.45833	0.96564	0.97445	0.034358	0.0074349	0.0018083	0.01487	0.96383	0.9777	239.489	413.468	397.238	408.744	419.757
XG57F	stopBlue	382.686	400.428	360.387	114.738	0.49104	0.50896	0.99821	0.99881	0.0017889	0	0.0017889	0.014286	0.99642	0.98571	257.262	119.389	101.219	127.782	119.007
ZL33U	stopGreen	523.339	562.368	437.185	278.766	0.50549	0.49451	0.98772	0.98929	0.012281	0.0074074	0.0052632	0.0074074	0.98246	0.98519	249.234	285.388	273.275	284.378	287.534
GT25Y	stopGreen	413.851	458.583	363.435	129.064	0.412	0.588	0.98419	0.98533	0.01581	0.012295	0.029644	0.045082	0.95455	0.94262	263.936	133.137	138.602	122.381	136.013
YK26R	stopBlue	419.543	470.494	382.95	159.564	0.49455	0.50545	0.99106	0.99284	0.0089445	0.0035842	0.025045	0.032258	0.96601	0.96416	248.436	157.885	146.338	172.504	158.182
WT99Y	stopGreen	522.915	532.21	463.65	159.809	0.48561	0.51439	0.93761	0.94286	0.062389	0.046595	0.01426	0.014337	0.92335	0.93907	349.191	163.804	144.963	173.825	164.45
ANF86	stopGreen	560.112	638.429	499.066	328.45	0.50183	0.49817	0.97163	0.97719	0.028369	0.011152	0.0035461	0.018587	0.96809	0.97026	230.549	337.391	325.796	331.125	342.766
