# Supplementary figures and images for: Right inferior frontal gyrus implements motor inhibitory control via beta-band oscillations in humans
Source: eLife journal article supplement (doi:10.7554/elife.61679), 2021-03-23

**A**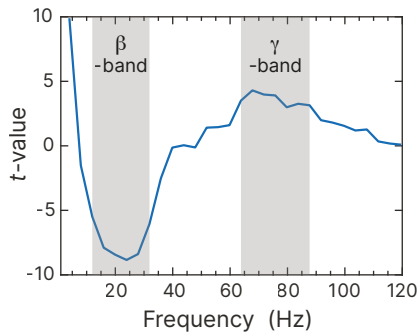**B**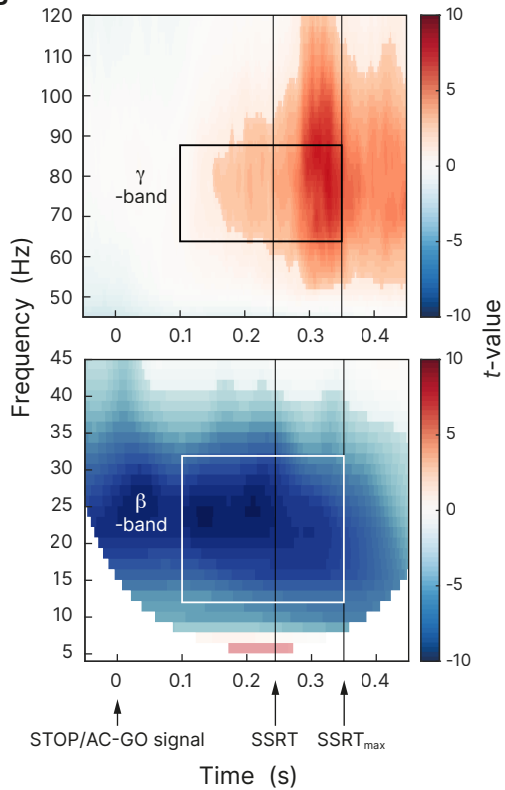

Supplement: supp [file elife_poa_e61679_Figure_2_figure_supplement_1.pdf › elife_poa_e61679_Figure_2_figure_supplement_1.pdf]
